# Supplementary material
Source: PubMed Central journal article supplement (PMC4933017)
Supplement: NIHMS797110-supplement-Supporting_Information.pdf [file NIHMS797110-supplement-Supporting_Information.pdf]

**Controlled release of an Anthrax toxin-neutralizing antibody  
from hydrolytically degradable polyethylene glycol  
hydrogels**

**Supporting Information**

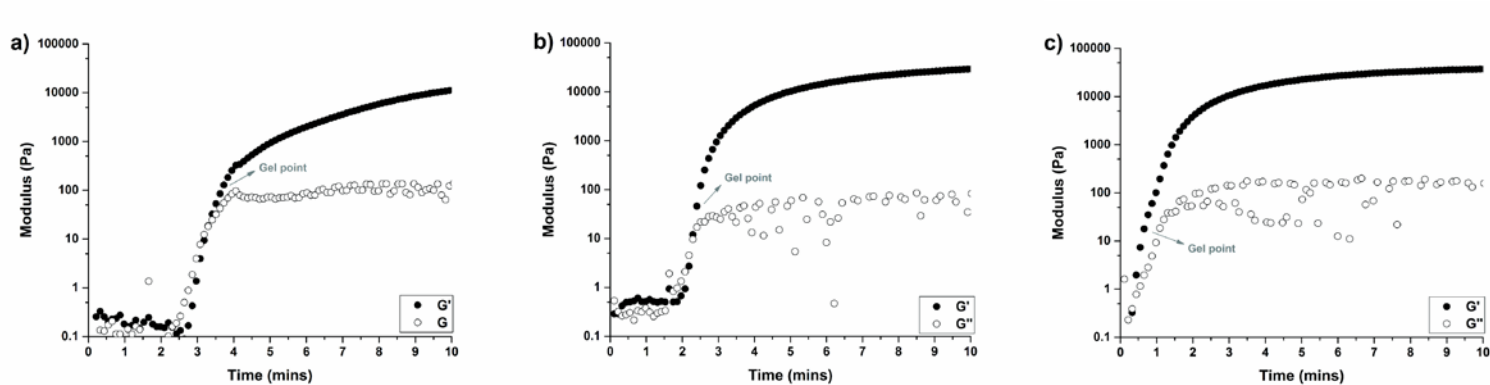

**Figure S1.** *In situ* gelation of 20wt% 4-arm 10/5K hydrogel (a), 8-arm 20/5K hydrogel (b) and 8-arm 10K/700 hydrogel (c), as characterized by oscillatory rheology. The evolution of  $G'$  (storage modulus) and  $G''$  (loss modulus) was monitored as a function of time.

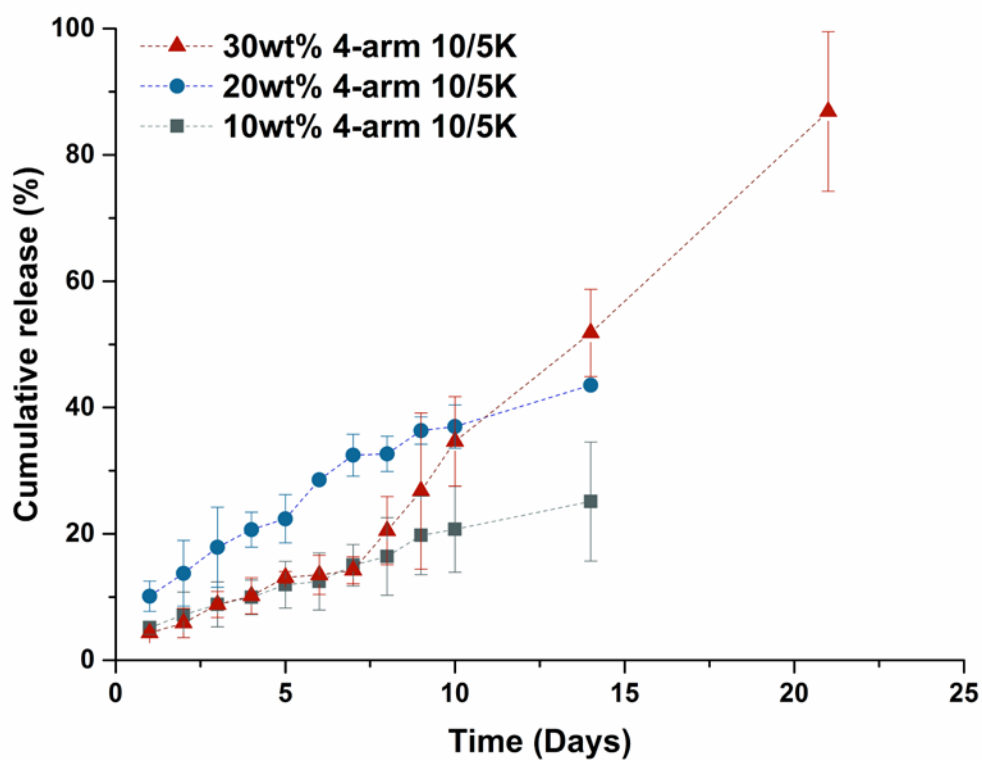

**Figure S2.** *In vitro* cumulative release of PANG from 4-arm 10/5K PEG hydrogels at different precursor concentrations, with an initial loading concentration of 5 mg/mL, as a function of time. The release of protein was monitored by measuring the absorbance, at 280 nm, of the buffer solution above the gel at the indicated time intervals.

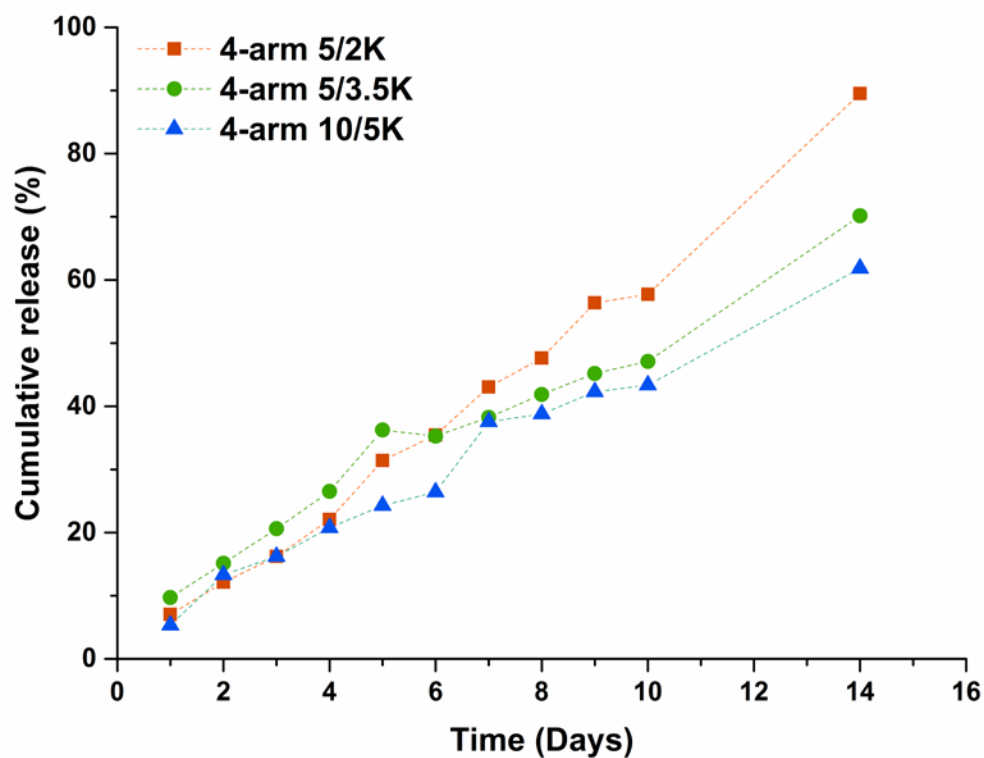

**Figure S3.** In vitro cumulative release of PANG from various 20wt% 4-arm hydrogels with different precursor molecular weights, with an initial loading concentration of 2.5 mg/mL, as a function of time. The release of protein was monitored by measuring the absorbance, at 280 nm, of the buffer solution above the gel at the indicated time intervals.

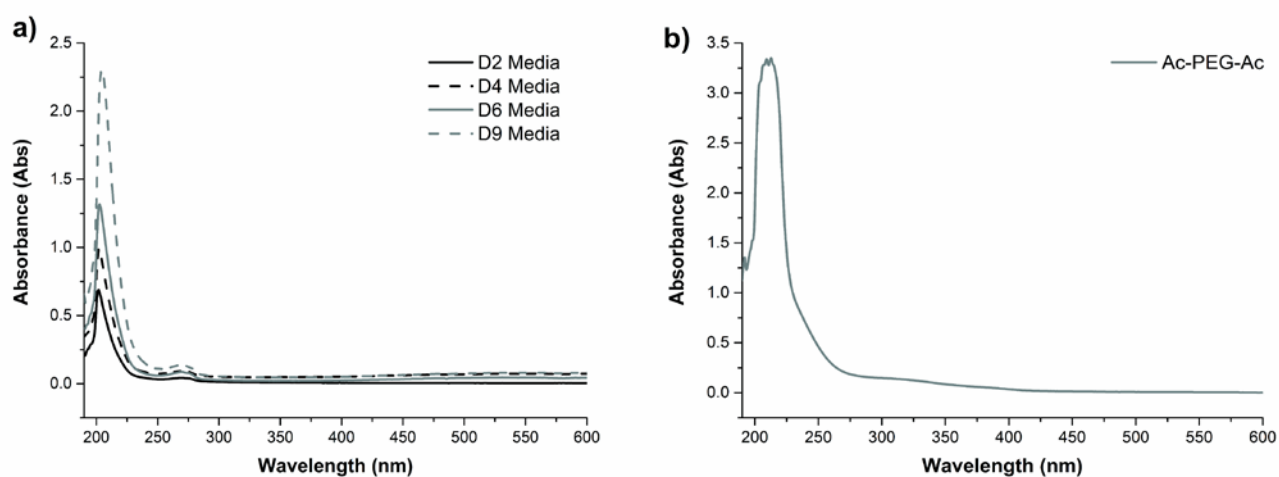

**Figure S4.** UV-Vis spectra of the release media from 20%wt 4-arm 10/5K hydrogel control (a) (without PANG) and linear PEG acrylate (2K) polymer solution (b). Absorption was observed at 280 nm
